# Supplementary material for: Antitumor Immunity Exerted by Natural Killer and Natural Killer T Cells in the Liver
Source: MDPI journal article supplement (doi:10.3390/jcm12030866), 2023-01-21
Supplement: s1 [file s1]

File S1. ClinicalTrials.gov Search Results 01/09/2023

|    | Title                                                                                                                                                                                                                                                          | Status     | Study Results        | Conditions                                                                                                                                                              | Interventions                                                                                       | Locations                                                                                                                              |
|----|----------------------------------------------------------------------------------------------------------------------------------------------------------------------------------------------------------------------------------------------------------------|------------|----------------------|-------------------------------------------------------------------------------------------------------------------------------------------------------------------------|-----------------------------------------------------------------------------------------------------|----------------------------------------------------------------------------------------------------------------------------------------|
| 1  | <a href="#">Natural Killer (NK) Cell Therapy Targeting CD33 in Acute Myeloid Leukemia</a>                                                                                                                                                                      | Recruiting | No Results Available | •AML, Adult                                                                                                                                                             | •Drug: QN-023a<br>•Drug: Cyclophosphamid<br>•Drug: Fludarabine<br>•Drug: Cytarabine<br>•Drug: VP-16 | •The first affiliated hospital of medical college of zhejiang university, Hangzhou, Zhejiang, China                                    |
| 2  | <a href="#">A Study of Universal CD19-Targeted UCAR-NK Cells Combined With HSCT for B Cell Hematologic Malignancies</a>                                                                                                                                        | Recruiting | No Results Available | •B-Cell Lymphoblastic Leukemia/Lymphoma                                                                                                                                 | •Biological: Anti-CD19 UCAR-NK cells                                                                | •920th Hospital of Joint Logistics Support Force of People's Liberation Army of China, Kunming, Yunnan, China                          |
| 3  | <a href="#">Clinical Study of the Safety and Efficacy of BCMA CAR-NK</a>                                                                                                                                                                                       | Recruiting | No Results Available | •Immunotherapy<br>•Multiple Myeloma                                                                                                                                     | •Drug: Chimeric Antigen Receptor NK Cell Injection Targeting BCMA (BCMA CAR-NK)                     | •Henan Cancer Hospital, Zhengzhou, Henan, China                                                                                        |
| 4  | <a href="#">CAR-NK Targeted CD19 for r/r B-cell Malignancies</a>                                                                                                                                                                                               | Recruiting | No Results Available | •Adult Relapsed/Refractory B-cell Hematologic Malignancies                                                                                                              | •Biological: CD19-CAR-NK                                                                            | •The Fifth Medical Center of Chinese People's Liberation Army (PLA) General Hospital, Beijing, Beijing, China                          |
| 5  | <a href="#">A Multi-Institution Study of TGF# Imprinted, Ex Vivo Expanded Universal Donor NK Cell Infusions as Adoptive Immunotherapy in Combination With Gemcitabine and Docetaxel in Patients With Relapsed or Refractory Pediatric Bone and Soft Tissue</a> | Recruiting | No Results Available | •Pediatric Sarcoma, Refractory<br>•Pediatric Sarcoma, Relapsed                                                                                                          | •Biological: GEM/DOX + TGFBi expanded NK cells                                                      | •National Pediatric Cancer Foundation, Tampa, Florida, United States<br>•Nationwide Children's Hospital, Columbus, Ohio, United States |
| 6  | <a href="#">Natural Killer(NK) Cell Therapy for Acute Myeloid Leukemia</a>                                                                                                                                                                                     | Recruiting | No Results Available | •AML, Adult                                                                                                                                                             | •Drug: QN-023a<br>•Drug: Cyclophosphamid<br>•Drug: Fludarabine<br>•Drug: Cytarabine                 | •Institute of Hematology & Blood Diseases Hospital, Tianjin, Tianjin, China                                                            |
| 7  | <a href="#">Natural Killer Cell Therapy (UD TGFbetai NK Cells) and Temozolomide for the Treatment of Stage IV Melanoma Metastatic to the Brain</a>                                                                                                             | Recruiting | No Results Available | •Clinical Stage IV Cutaneous Melanoma AJCC v8<br>•Metastatic Malignant Neoplasm in the Brain<br>•Metastatic Melanoma<br>•Pathologic Stage IV Cutaneous Melanoma AJCC v8 | •Biological: Natural Killer Cell Therapy<br>•Drug: Temozolomide                                     | •Ohio State University Comprehensive Cancer Center, Columbus, Ohio, United States                                                      |
| 8  | <a href="#">Cytokine-Induced Memory-Like Natural Killer Cells (CIML-NK) for Relapsed &amp; Refractory Acute Myeloid Leukemia (AML)</a>                                                                                                                         | Recruiting | No Results Available | •Acute Myeloid Leukemia                                                                                                                                                 | •Drug: CIML-NK Cells                                                                                | •Cincinnati Children's Hospital Medical Center, Cincinnati, Ohio, United States                                                        |
| 9  | <a href="#">Allogenic CD123-CAR-NK Cells in the Treatment of Refractory/Relapsed Acute Myeloid Leukemia</a>                                                                                                                                                    | Recruiting | No Results Available | •Acute Myeloid Leukemia Refractory<br>•Acute Myeloid Leukemia Recurrent                                                                                                 | •Biological: CD123-CAR-NK cells                                                                     | •The Fifth Medical Center of Chinese People's Liberation Army (PLA) General Hospital, Beijing, Beijing, China                          |
| 10 | <a href="#">NKG2D-CAR-NK92 Cells Immunotherapy for Solid Tumors</a>                                                                                                                                                                                            | Recruiting | No Results Available | •Relapsed/Refractory Solid Tumors                                                                                                                                       | •Biological: NKG2D-CAR-NK92 cells                                                                   | •The first Affiliated Hospital of Xinxiang Medical University, Xinxiang, Henan, China                                                  |
| 11 | <a href="#">Study of DLL3-CAR-NK Cells in the Treatment of Extensive Stage Small Cell Lung Cancer</a>                                                                                                                                                          | Recruiting | No Results Available | •SCLC, Extensive Stage                                                                                                                                                  | •Biological: DLL3-CAR-NK cells                                                                      | •Tianjin Medical University Cancer Institute and Hospital, Tianjin, Tianjin, China                                                     |
| 12 | <a href="#">Safety and Efficacy of Expanded, Universal Donor Natural Killer Cells for Relapsed/Refractory AML</a>                                                                                                                                              | Recruiting | No Results Available | •Acute Myeloid Leukemia                                                                                                                                                 | •Biological: Universal Donor Natural Killer Cells                                                   | •Nationwide Children's Hospital, Columbus, Ohio, United States                                                                         |
| 13 | <a href="#">Clinical Study of Cord Blood-derived CAR-NK Cells Targeting CD19 in the Treatment of Refractory/Relapsed B-cell NHL</a>                                                                                                                            | Recruiting | No Results Available | •B-cell Non Hodgkin Lymphoma                                                                                                                                            | •Biological: anti-CD19 CAR-NK                                                                       | •2nd Affiliated Hospital, School of Medicine, Zhejiang University, Hanzhou, Zhejiang, China                                            |
| 14 | <a href="#">CLDN6-CAR-NK Cell Therapy for Advanced Solid Tumors</a>                                                                                                                                                                                            | Recruiting | No Results Available | •Stage IV Ovarian Cancer<br>•Testis Cancer, Refractory<br>•Endometrial Cancer Recurrent<br>•CAR NK                                                                      | •Biological: Claudin6 targeting CAR-NK cells                                                        | •The Second Affiliated Hospital of Guangzhou Medical University, Guangzhou, Guangdong, China                                           |

|    | Title                                                                                                                                                                                                                | Status     | Study Results        | Conditions                                                                                                                                                                                                                                                                                                                                                                                                                                                                                                                      | Interventions                                                                                                                                                                                                                   | Locations                                                                                                                                                        |
|----|----------------------------------------------------------------------------------------------------------------------------------------------------------------------------------------------------------------------|------------|----------------------|---------------------------------------------------------------------------------------------------------------------------------------------------------------------------------------------------------------------------------------------------------------------------------------------------------------------------------------------------------------------------------------------------------------------------------------------------------------------------------------------------------------------------------|---------------------------------------------------------------------------------------------------------------------------------------------------------------------------------------------------------------------------------|------------------------------------------------------------------------------------------------------------------------------------------------------------------|
| 15 | <a href="#">Anti-CD19 CAR-Engineered NK Cells in the Treatment of Relapsed/Refractory B-cell Malignancies</a>                                                                                                        | Recruiting | No Results Available | <ul style="list-style-type: none"><li>•Acute Lymphocytic Leukemia</li><li>•Chronic Lymphocytic Leukemia</li><li>•Non Hodgkin Lymphoma</li></ul>                                                                                                                                                                                                                                                                                                                                                                                 | <ul style="list-style-type: none"><li>•Biological: CAR-NK-CD19 Cells</li></ul>                                                                                                                                                  | <ul style="list-style-type: none"><li>•Beijing Boren Hospital, Beijing, Beijing, China</li></ul>                                                                 |
| 16 | <a href="#">Natural Killer (NK) Cells in Combination With Interleukin-2 (IL-2) and Transforming Growth Factor Beta (TGFbeta) Receptor I Inhibitor Vactosertib in Cancer</a>                                          | Recruiting | No Results Available | <ul style="list-style-type: none"><li>•Colorectal Cancer</li><li>•Hematologic Malignancy</li><li>•Rectum Cancer</li><li>•Acute Myeloid Leukemia</li><li>•Myelodysplastic Syndromes</li><li>•Acute Lymphoblastic Leukemia</li><li>•Chronic Myeloid Leukemia</li><li>•Chronic Lymphocytic Leukemia</li><li>•Hodgkin Lymphoma</li><li>•Non Hodgkin Lymphoma</li><li>•Myeloproliferative Syndrome</li><li>•Plasma Cell Myeloma</li></ul>                                                                                            | <ul style="list-style-type: none"><li>•Drug: Vactosertib</li><li>•Drug: Fludarabine Phosphate</li><li>•Drug: Cyclophosphamide</li><li>•Drug: IL-2</li><li>•Drug: Natural Killer Cells</li></ul>                                 | <ul style="list-style-type: none"><li>•University Hospitals Cleveland Medical Center, Case Comprehensive Cancer Center, Cleveland, Ohio, United States</li></ul> |
| 17 | <a href="#">A Phase I, Autologous ex Vivo Expanded and Activated NK Cell, Magicell-NK, Infusion for Colon Cancer Post Resection Study</a>                                                                            | Recruiting | No Results Available | <ul style="list-style-type: none"><li>•Colon Cancer Stage I</li></ul>                                                                                                                                                                                                                                                                                                                                                                                                                                                           | <ul style="list-style-type: none"><li>•Biological: Magicell-NK contains NK cells suspended in 100 mL normal saline</li></ul>                                                                                                    | <ul style="list-style-type: none"><li>•Chang Gung Memorial Hospital, Linkou, Taoyuan, Taiwan</li></ul>                                                           |
| 18 | <a href="#">Natural Killer (NK) Cell Therapy for B-Cell Malignancies</a>                                                                                                                                             | Recruiting | No Results Available | <ul style="list-style-type: none"><li>•B-cell Lymphoma</li><li>•B-cell Acute Lymphoblastic Leukemia</li></ul>                                                                                                                                                                                                                                                                                                                                                                                                                   | <ul style="list-style-type: none"><li>•Drug: QN-019a</li><li>•Drug: Rituximab</li><li>•Drug: Cyclophosphamid</li><li>•Drug: Fludarabine</li><li>•Drug: VP-16</li></ul>                                                          | <ul style="list-style-type: none"><li>•The First Affiliated Hospital of Medical College of Zhejiang University, Hangzhou, Zhejiang, China</li></ul>              |
| 19 | <a href="#">Expanded Haploidentical Natural Killer Cells as Consolidation Strategy for Children/Young Adults With AML</a>                                                                                            | Recruiting | No Results Available | <ul style="list-style-type: none"><li>•Acute Myeloid Leukemia</li></ul>                                                                                                                                                                                                                                                                                                                                                                                                                                                         | <ul style="list-style-type: none"><li>•Biological: Expanded haploidentical NK cells</li></ul>                                                                                                                                   | <ul style="list-style-type: none"><li>•Belarussian Research Center for Pediatric Oncology, Hematology and Immunology, Minsk, Minsk Region, Belarus</li></ul>     |
| 20 | <a href="#">Genetically Engineered Natural Killer (NK) Cells With or Without Atezolizumab for the Treatment of Non-small Cell Lung Cancer Previously Treated With PD-1 and/or PD-L1 Immune Checkpoint Inhibitors</a> | Recruiting | No Results Available | <ul style="list-style-type: none"><li>•Advanced Lung Non-Small Cell Carcinoma</li><li>•Metastatic Lung Non-Small Cell Carcinoma</li><li>•Recurrent Lung Non-Small Cell Carcinoma</li><li>•Refractory Lung Non-Small Cell Carcinoma</li><li>•Stage III Lung Cancer AJCC v8</li><li>•Stage IIIA Lung Cancer AJCC v8</li><li>•Stage IIIB Lung Cancer AJCC v8</li><li>•Stage IIIC Lung Cancer AJCC v8</li><li>•Stage IV Lung Cancer AJCC v8</li><li>•Stage IVA Lung Cancer AJCC v8</li><li>•Stage IVB Lung Cancer AJCC v8</li></ul> | <ul style="list-style-type: none"><li>•Biological: Antineoplastic Immune Cell</li><li>•Biological: Atezolizumab</li><li>•Procedure: Biospecimen Collection</li><li>•Drug: Cyclophosphamide</li><li>•Drug: Fludarabine</li></ul> | <ul style="list-style-type: none"><li>•City of Hope Comprehensive Cancer Center, Duarte, California, United States</li></ul>                                     |
| 21 | <a href="#">Donor Immune Cell Therapy for Acute Myeloid Leukemia</a>                                                                                                                                                 | Recruiting | No Results Available | <ul style="list-style-type: none"><li>•Acute Myeloid Leukemia</li></ul>                                                                                                                                                                                                                                                                                                                                                                                                                                                         | <ul style="list-style-type: none"><li>•Biological: infusion of natural killer cells</li></ul>                                                                                                                                   | <ul style="list-style-type: none"><li>•First Affiliated Hospital of Xian Jiaotong University, Xi'an, Shaanxi, China</li></ul>                                    |

|    | Title                                                                                                                                                                                                                  | Status     | Study Results        | Conditions                                                                                    | Interventions                                                                                                | Locations                                                                                                                                                                                                                                                                                                                                                                                                                                                                                                                                                                                                                                                                                                         |
|----|------------------------------------------------------------------------------------------------------------------------------------------------------------------------------------------------------------------------|------------|----------------------|-----------------------------------------------------------------------------------------------|--------------------------------------------------------------------------------------------------------------|-------------------------------------------------------------------------------------------------------------------------------------------------------------------------------------------------------------------------------------------------------------------------------------------------------------------------------------------------------------------------------------------------------------------------------------------------------------------------------------------------------------------------------------------------------------------------------------------------------------------------------------------------------------------------------------------------------------------|
| 22 | <a href="#">"Phase I / II Study on Infusion of Natural Killer Cells After Haploidentical Transplantation in Pediatric Patients"</a>                                                                                    | Recruiting | No Results Available | •High-risk Leukemias                                                                          | •Biological: NK cells stimulated ex vivo with IL-15<br><br>•Biological: Alloreactive NK cells                | •Hospital Clínico Universitario de Santiago, Santiago De Compostela, A Coruña, Spain<br><br>•Hospital Universitario Central de Asturias, Oviedo, Asturias, Spain<br><br>•Hospital de la Santa Creu i Sant Pau, Barcelona, Spain<br><br>•Hospital General Universitario Gregorio Marañón, Madrid, Spain<br><br>•Hospital Infantil Universitario Niño Jesús, Madrid, Spain<br><br>•Hospital Universitario La Paz, Madrid, Spain<br><br>•Hospital Clínico Universitario Virgen de la Arrixaca, Murcia, Spain<br><br>•Hospital Regional Universitario de Málaga (Carlos de Haya), Málaga, Spain<br><br>•Hospital Universitario Virgen del Rocío, Sevilla, Spain<br><br>•Hospital Universitario La Fe, Valencia, Spain |
| 23 | <a href="#">Immunotherapy With ex Vivo Expanded Haploidentical Natural Killer Cells for Children/Young Adults With AML</a>                                                                                             | Recruiting | No Results Available | •Acute Myeloid Leukemia                                                                       | •Biological: NK cell infusions                                                                               | •Belarussian Research Center for Pediatric Oncology, Hematology and Immunology, Minsk, Minsk Region, Belarus                                                                                                                                                                                                                                                                                                                                                                                                                                                                                                                                                                                                      |
| 24 | <a href="#">NK Cell Therapy for AML</a>                                                                                                                                                                                | Recruiting | No Results Available | •AML                                                                                          | •Drug: CT101a                                                                                                | •The First Affiliated Hospital#College of Medicine, Zhejiang University, Hangzhou, Zhejiang, China                                                                                                                                                                                                                                                                                                                                                                                                                                                                                                                                                                                                                |
| 25 | <a href="#">Ex Vivo Expanded NK Cells Infusion Decrease Relapse Post Hematopoietic Stem Cell Transplantation</a>                                                                                                       | Recruiting | No Results Available | •Hematologic Malignancy                                                                       | •Procedure: Allogeneic Hematopoietic Stem Cell Transplantation                                               | •West China Hospital of Sichuan University, Chengdu, Sichuan, China                                                                                                                                                                                                                                                                                                                                                                                                                                                                                                                                                                                                                                               |
| 26 | <a href="#">NKG2D CAR-T Cells to Treat Patients With Previously Treated Liver Metastatic Colorectal Cancer</a>                                                                                                         | Recruiting | No Results Available | •Refractory Metastatic Colorectal Cancer                                                      | •Biological: CAR-T infusion                                                                                  | •The Third Affiliated Hospital of Guangzhou Medical University, Guangzhou, Guangdong, China                                                                                                                                                                                                                                                                                                                                                                                                                                                                                                                                                                                                                       |
| 27 | <a href="#">NKG2D CAR-NK Cell Therapy in Patients With Relapsed or Refractory Acute Myeloid Leukemia</a>                                                                                                               | Recruiting | No Results Available | •Safety and Efficacy                                                                          | •Biological: CAR-NK cells                                                                                    | •Hebei Yanda Lu Daopei Hospital, Sanhe, Hebei, China                                                                                                                                                                                                                                                                                                                                                                                                                                                                                                                                                                                                                                                              |
| 28 | <a href="#">Study of Anti-CD33/CLL1 CAR-NK in Acute Myeloid Leukemia</a>                                                                                                                                               | Recruiting | No Results Available | •Acute Myeloid Leukemia                                                                       | •Biological: Anti-CD33/CLL1 CAR-NK Cells                                                                     | •Wuxi People's Hospital, Wuxi, Jiangsu, China                                                                                                                                                                                                                                                                                                                                                                                                                                                                                                                                                                                                                                                                     |
| 29 | <a href="#">NKG2D CAR-NK Cell Therapy in Patients With Refractory Metastatic Colorectal Cancer</a>                                                                                                                     | Recruiting | No Results Available | •Refractory Metastatic Colorectal Cancer                                                      | •Drug: NKG2D CAR-NK                                                                                          | •The First Affiliated Hospital, Zhejiang University, Hangzhou, Zhejiang, China                                                                                                                                                                                                                                                                                                                                                                                                                                                                                                                                                                                                                                    |
| 30 | <a href="#">Study of Anti-5T4 CAR-NK Cell Therapy in Advanced Solid Tumors</a>                                                                                                                                         | Recruiting | No Results Available | •Advanced Solid Tumors                                                                        | •Biological: Anti-CAR-NK Cells                                                                               | •Wuxi People's Hospital, Wuxi, Jiangsu, China                                                                                                                                                                                                                                                                                                                                                                                                                                                                                                                                                                                                                                                                     |
| 31 | <a href="#">Camrelizumab in Combination With Apatinib Plus NK Cell for Advanced HCC</a>                                                                                                                                | Recruiting | No Results Available | •Hepatocellular Carcinoma                                                                     | •Drug: Apatinib<br><br>•Drug: Camrelizumab<br><br>•Drug: NK cell                                             | •Nanfang Hospital of Southern Medical University, Guangzhou, Guangdong, China                                                                                                                                                                                                                                                                                                                                                                                                                                                                                                                                                                                                                                     |
| 32 | <a href="#">Treatment of Malignant Tumors With NK Cell</a>                                                                                                                                                             | Recruiting | No Results Available | •Malignancy                                                                                   | •Biological: Decitabine combined with NK cell infusion                                                       | •Shenzhen University General hospital, Shenzhen, Guangdong, China                                                                                                                                                                                                                                                                                                                                                                                                                                                                                                                                                                                                                                                 |
| 33 | <a href="#">Nk Cell Therapy for Recurrent Glioblastoma Multiform Patients</a>                                                                                                                                          | Recruiting | No Results Available | •Glioblastoma Multiform<br><br>•Recurrent Glioblastoma                                        | •Biological: NK cell therapy                                                                                 | •Royan institute, Tehran, Iran, Islamic Republic of                                                                                                                                                                                                                                                                                                                                                                                                                                                                                                                                                                                                                                                               |
| 34 | <a href="#">Phase I/II Study of CAR.70- Engineered IL15-transduced Cord Blood-derived NK Cells in Conjunction With Lymphodepleting Chemotherapy for the Management of Relapse/Refractory Hematological Malignances</a> | Recruiting | No Results Available | •B-Cell Lymphoma<br><br>•Myelodysplastic Syndromes (MDS)<br><br>•Acute Myeloid Leukemia (AML) | •Drug: Cyclophosphamide<br><br>•Drug: CAR.70/IL15-transduced CB-NK cells<br><br>•Drug: Fludarabine phosphate | •M D Anderson Cancer Center, Houston, Texas, United States                                                                                                                                                                                                                                                                                                                                                                                                                                                                                                                                                                                                                                                        |
| 35 | <a href="#">Natural Killer (NK) Cell Therapy in Locally Advanced HCC</a>                                                                                                                                               | Recruiting | No Results Available | •Locally Advanced Hepatocellular Carcinoma                                                    | •Biological: Vax-NK/HCC                                                                                      | •Seon-Ah Ha, Hwasun, Jeollanam-do, Korea, Republic of                                                                                                                                                                                                                                                                                                                                                                                                                                                                                                                                                                                                                                                             |
| 36 | <a href="#">Anti-CD33 CAR NK Cells in the Treatment of Relapsed/ Refractory Acute Myeloid Leukemia</a>                                                                                                                 | Recruiting | No Results Available | •Leukemia, Myeloid, Acute                                                                     | •Biological: anti-CD33 CAR NK cells<br><br>•Drug: Fludarabine<br><br>•Drug: Cytosan                          | •Department of Hematology, Xinqiao Hospital, Chongqing, Chongqing, China                                                                                                                                                                                                                                                                                                                                                                                                                                                                                                                                                                                                                                          |

|    | Title                                                                                                                                                                                                                                                                                   | Status     | Study Results        | Conditions                                                                                                                                                                                                         | Interventions                                                                                                                                                                                         | Locations                                                                                                                                                                                                                                                                                                                                                                                                                                                                                                                                                                           |
|----|-----------------------------------------------------------------------------------------------------------------------------------------------------------------------------------------------------------------------------------------------------------------------------------------|------------|----------------------|--------------------------------------------------------------------------------------------------------------------------------------------------------------------------------------------------------------------|-------------------------------------------------------------------------------------------------------------------------------------------------------------------------------------------------------|-------------------------------------------------------------------------------------------------------------------------------------------------------------------------------------------------------------------------------------------------------------------------------------------------------------------------------------------------------------------------------------------------------------------------------------------------------------------------------------------------------------------------------------------------------------------------------------|
| 37 | <a href="#">Anti-BCMA CAR-NK Cell Therapy for the Relapsed or Refractory Multiple Myeloma</a>                                                                                                                                                                                           | Recruiting | No Results Available | •Multiple Myeloma, Refractory                                                                                                                                                                                      | •Biological: Anti-BCMA CAR-NK Cells<br>•Drug: Fludarabine<br>•Drug: Cytosan                                                                                                                           | •Department of Hematology, Xinqiao Hospital, Chongqing, Chongqing, China                                                                                                                                                                                                                                                                                                                                                                                                                                                                                                            |
| 38 | <a href="#">Safety and Efficacy of Allogeneic NK Cell Infusions in Patients With Relapsed/Refractory AML and High Risk MDS</a>                                                                                                                                                          | Recruiting | No Results Available | •AML, Adult Recurrent<br>•MDS                                                                                                                                                                                      | •Biological: DVX201                                                                                                                                                                                   | •Duke University Hospital, Durham, North Carolina, United States                                                                                                                                                                                                                                                                                                                                                                                                                                                                                                                    |
| 39 | <a href="#">Clinical Study of HLA Haploidentical CAR-NK Cells Targeting CD19 in the Treatment of Refractory/Relapsed B-cell NHL</a>                                                                                                                                                     | Recruiting | No Results Available | •B-cell Non Hodgkin Lymphoma                                                                                                                                                                                       | •Biological: anti-CD19 CAR-NK                                                                                                                                                                         | •2nd Affiliated Hospital, School of Medicine, Zhejiang University, Hangzhou, Zhejiang, China                                                                                                                                                                                                                                                                                                                                                                                                                                                                                        |
| 40 | <a href="#">A Study to Evaluate the Safety and Anti-tumor Activity of SNK01 (NK Cells) Administered in Combination With Chemotherapy or Chemotherapy / Cetuximab in Local Advanced or Metastatic Non-small Cell Lung Cancer Patients Who Failed Tyrosine Kinase Inhibitor Treatment</a> | Recruiting | No Results Available | •Non-small Cell Lung Cancer                                                                                                                                                                                        | •Biological: SNK01 (Super Natural Killer Cells 01)<br>•Drug: GC<br>•Biological: Cetuximab                                                                                                             | •Asan Medical Center, Seoul, Songpa-gu, Korea, Republic of                                                                                                                                                                                                                                                                                                                                                                                                                                                                                                                          |
| 41 | <a href="#">Third-Party Natural Killer Cells and Mogamulizumab for the Treatment of Relapsed or Refractory Cutaneous T-cell Lymphomas or Adult T-Cell Leukemia/Lymphoma</a>                                                                                                             | Recruiting | No Results Available | •Recurrent Adult T-Cell Leukemia/ Lymphoma<br>•Recurrent Primary Cutaneous T-Cell Non-Hodgkin Lymphoma<br>•Refractory Adult T-Cell Leukemia/ Lymphoma<br>•Refractory Primary Cutaneous T-Cell Non-Hodgkin Lymphoma | •Drug: Cyclophosphamide<br>•Drug: Fludarabine<br>•Biological: Mogamulizumab<br>•Biological: Natural Killer Cell Therapy<br>•Other: Quality-of-Life Assessment<br>•Other: Questionnaire Administration | •Ohio State University Comprehensive Cancer Center, Columbus, Ohio, United States                                                                                                                                                                                                                                                                                                                                                                                                                                                                                                   |
| 42 | <a href="#">Immunotherapy Combination: Irradiated PD-L1 CAR-NK Cells Plus Pembrolizumab Plus N-803 for Subjects With Recurrent/ Metastatic Gastric or Head and Neck Cancer</a>                                                                                                          | Recruiting | No Results Available | •Gastroesophageal Junction (GEJ) Cancers<br>•Advanced HNSCC                                                                                                                                                        | •Drug: N-803<br>•Drug: Pembrolizumab<br>•Biological: PD-L1 t-haNK                                                                                                                                     | •National Institutes of Health Clinical Center, Bethesda, Maryland, United States                                                                                                                                                                                                                                                                                                                                                                                                                                                                                                   |
| 43 | <a href="#">Cord Blood Derived Anti-CD19 CAR-Engineered NK Cells for B Lymphoid Malignancies</a>                                                                                                                                                                                        | Recruiting | No Results Available | •Acute Lymphocytic Leukemia<br>•Chronic Lymphocytic Leukemia<br>•Non Hodgkin's Lymphoma                                                                                                                            | •Drug: Fludarabine + Cyclophosphamide + CAR-NK-CD19 Cells                                                                                                                                             | •Union Hospital, Huazhong University of Science and Technology, Wuhan, Hubei, China                                                                                                                                                                                                                                                                                                                                                                                                                                                                                                 |
| 44 | <a href="#">Autologous Memory-like NK Cell Therapy With BHV-1100 (Formerly KP1237), Low Dose IL-2 in Multiple Myeloma Patients</a>                                                                                                                                                      | Recruiting | No Results Available | •Multiple Myeloma                                                                                                                                                                                                  | •Combination Product: CIML NK Cells plus KP1237 and low dose IL-2                                                                                                                                     | •Dana Farber Cancer Institute, Boston, Massachusetts, United States                                                                                                                                                                                                                                                                                                                                                                                                                                                                                                                 |
| 45 | <a href="#">NKX101, Intravenous Allogeneic CAR NK Cells, in Adults With AML or MDS</a>                                                                                                                                                                                                  | Recruiting | No Results Available | •Relapsed/Refractory AML<br>•AML, Adult<br>•MDS<br>•Refractory Myelodysplastic Syndromes                                                                                                                           | •Biological: NKX101 - CAR NK cell therapy                                                                                                                                                             | •Colorado Blood Cancer Institute, Denver, Colorado, United States<br>•Winship Cancer Institute, Emory University, Atlanta, Georgia, United States<br>•University of Chicago Medical Center, Chicago, Illinois, United States<br>•The Cleveland Clinic - Taussig Cancer Institute, Cleveland, Ohio, United States<br>•Sarah Cannon at TriStar Bone Marrow Transplant Center, Nashville, Tennessee, United States<br>•MD Anderson Cancer Center, University of Texas, Houston, Texas, United States<br>•Methodist Healthcare System of San Antonio, San Antonio, Texas, United States |
| 46 | <a href="#">Allogeneic PB103 (NK Cells) Therapy in Non-small Cell Lung Cancer (NSCLC) Patients</a>                                                                                                                                                                                      | Recruiting | No Results Available | •Non-small Cell Lung Cancer                                                                                                                                                                                        | •Biological: donor-derived NK cell infusion                                                                                                                                                           | •Tri-Service General Hospital, Taipei city, Taiwan                                                                                                                                                                                                                                                                                                                                                                                                                                                                                                                                  |
| 47 | <a href="#">Clinical Trial for Autologus NK Cells Alone or in Combination With Isatuximab as Maintenance for Multiple Myeloma</a>                                                                                                                                                       | Recruiting | No Results Available | •Multiple Myeloma                                                                                                                                                                                                  | •Drug: CellProtect<br>•Drug: Isatuximab                                                                                                                                                               | •Karolinska University Hospital, Huddinge, Stockholm, Sweden                                                                                                                                                                                                                                                                                                                                                                                                                                                                                                                        |

|    | Title                                                                                               | Status                 | Study Results        | Conditions                                                                                                                                                                                                                                                                                                                                                                                  | Interventions                                                                                                                                                                                                  | Locations                                                                                                                                                                                                                                                                                                                                                                                                                                                                                                                                                                                                                                                                                                                                                                                                                                   |
|----|-----------------------------------------------------------------------------------------------------|------------------------|----------------------|---------------------------------------------------------------------------------------------------------------------------------------------------------------------------------------------------------------------------------------------------------------------------------------------------------------------------------------------------------------------------------------------|----------------------------------------------------------------------------------------------------------------------------------------------------------------------------------------------------------------|---------------------------------------------------------------------------------------------------------------------------------------------------------------------------------------------------------------------------------------------------------------------------------------------------------------------------------------------------------------------------------------------------------------------------------------------------------------------------------------------------------------------------------------------------------------------------------------------------------------------------------------------------------------------------------------------------------------------------------------------------------------------------------------------------------------------------------------------|
| 48 | <a href="#">Clinical Study of Autologous Natural Killer Cells in Multiple Myeloma</a>               | Active, not recruiting | No Results Available | <ul style="list-style-type: none"> <li>•Multiple Myeloma</li> </ul>                                                                                                                                                                                                                                                                                                                         | <ul style="list-style-type: none"> <li>•Drug: autologous NK cells</li> </ul>                                                                                                                                   | <ul style="list-style-type: none"> <li>•Karolinska University Hospital, Stockholm, Sweden</li> </ul>                                                                                                                                                                                                                                                                                                                                                                                                                                                                                                                                                                                                                                                                                                                                        |
| 49 | <a href="#">Natural Killer-cell Therapy for Acute Myeloid Leukemia</a>                              | Recruiting             | No Results Available | <ul style="list-style-type: none"> <li>•Acute Myeloid Leukemia Refractory</li> <li>•Acute Myeloid Leukemia, Relapsed, Adult</li> </ul>                                                                                                                                                                                                                                                      | <ul style="list-style-type: none"> <li>•Biological: UCB-NK cells</li> <li>•Drug: IL-2</li> </ul>                                                                                                               | <ul style="list-style-type: none"> <li>•Radboud University Medical Center, Nijmegen, Netherlands</li> </ul>                                                                                                                                                                                                                                                                                                                                                                                                                                                                                                                                                                                                                                                                                                                                 |
| 50 | <a href="#">Natural Killer Cell (CYNK-001) Infusions in Adults With AML</a>                         | Recruiting             | No Results Available | <ul style="list-style-type: none"> <li>•Leukemia</li> <li>•Leukemia, Myeloid</li> <li>•Leukemia, Myeloid, Acute</li> <li>•Neoplasms by Histologic Type</li> <li>•Neoplasms</li> <li>•Immunosuppressive Agents</li> <li>•Immunologic Factors</li> <li>•Physiological Effects of Drugs</li> <li>•Alkylating Agents</li> <li>•Antimetabolites, Antineoplastic</li> <li>•and 10 more</li> </ul> | <ul style="list-style-type: none"> <li>•Biological: CYNK-001</li> </ul>                                                                                                                                        | <ul style="list-style-type: none"> <li>•Colorado Blood Cancer Institute, Denver, Colorado, United States</li> <li>•University of Chicago, Chicago, Illinois, United States</li> <li>•Hackensack University Medical Center, Hackensack, New Jersey, United States</li> <li>•Roswell Park Comprehensive Cancer Center, Buffalo, New York, United States</li> <li>•Columbia University and New York Presbyterian Hospital, New York, New York, United States</li> <li>•Memorial Sloan Kettering Cancer Center, New York, New York, United States</li> <li>•Westchester Medical Center, Valhalla, New York, United States</li> <li>•Tennessee Oncology, Nashville, Tennessee, United States</li> <li>•MD Anderson Cancer Center, Houston, Texas, United States</li> <li>•Swedish Health Services, Seattle, Washington, United States</li> </ul> |
| 51 | <a href="#">Natural Killer Cell (CYNK-001) Infusions in Adults With Multiple Myeloma</a>            | Active, not recruiting | No Results Available | <ul style="list-style-type: none"> <li>•Multiple Myeloma</li> <li>•Neoplasm, Plasma Cell</li> <li>•Neoplasms by Histologic Type</li> <li>•Neoplasms</li> <li>•Hemostatic Disorder</li> <li>•Vascular Diseases</li> <li>•Cardiovascular Diseases</li> <li>•Paraproteinemias</li> <li>•Blood Protein Disorders</li> <li>•Hematologic Diseases</li> <li>•and 10 more</li> </ul>                | <ul style="list-style-type: none"> <li>•Biological: CYNK-001</li> </ul>                                                                                                                                        | <ul style="list-style-type: none"> <li>•Colorado Blood Cancer Institute, Denver, Colorado, United States</li> <li>•Moffitt Cancer Center, Tampa, Florida, United States</li> <li>•Franciscan Health, Indianapolis, Indiana, United States</li> <li>•Washington University, Saint Louis, Missouri, United States</li> <li>•University of Nebraska Medical Center, Omaha, Nebraska, United States</li> <li>•Hackensack University Medical Center, Hackensack, New Jersey, United States</li> <li>•Roswell Park Comprehensive Cancer Institute, Buffalo, New York, United States</li> <li>•Oregon Health Knight Cancer Institute, Portland, Oregon, United States</li> <li>•Tennessee Oncology, Nashville, Tennessee, United States</li> </ul>                                                                                                 |
| 52 | <a href="#">Ph1 Trial Test Safety of IL-21 NK Cells for Induction of R/R AML</a>                    | Recruiting             | No Results Available | <ul style="list-style-type: none"> <li>•Allogeneic Stem Cell Transplant Recipient</li> <li>•Blasts 10 Percent or More of Bone Marrow Nucleated Cells</li> <li>•Recurrent Acute Myeloid Leukemia</li> <li>•Refractory Acute Myeloid Leukemia</li> </ul>                                                                                                                                      | <ul style="list-style-type: none"> <li>•Drug: Cytarabine Hydrochloride</li> <li>•Drug: Fludarabine</li> <li>•Biological: Membrane-bound Interleukin-21-Expanded Haploidentical Natural Killer Cells</li> </ul> | <ul style="list-style-type: none"> <li>•Ohio State University Comprehensive Cancer Center, Columbus, Ohio, United States</li> </ul>                                                                                                                                                                                                                                                                                                                                                                                                                                                                                                                                                                                                                                                                                                         |
| 53 | <a href="#">NK Cells Infusions With Irinotecan, Temozolomide, and Dinutuximab</a>                   | Recruiting             | No Results Available | <ul style="list-style-type: none"> <li>•Relapsed Neuroblastoma</li> <li>•Refractory Neuroblastoma</li> </ul>                                                                                                                                                                                                                                                                                | <ul style="list-style-type: none"> <li>•Biological: Natural Killer Cells</li> <li>•Drug: Temozolomide</li> <li>•Drug: Irinotecan</li> <li>•Drug: Dinutuximab</li> <li>•Drug: Sargramostim</li> </ul>           | <ul style="list-style-type: none"> <li>•Nationwide Children's Hospital, Columbus, Ohio, United States</li> </ul>                                                                                                                                                                                                                                                                                                                                                                                                                                                                                                                                                                                                                                                                                                                            |
| 54 | <a href="#">Haploidentical Stem Cell Transplant With or Without NK Cell Infusion in AML and MDS</a> | Recruiting             | No Results Available | <ul style="list-style-type: none"> <li>•Acute Myeloid Leukemia</li> <li>•Myelodysplasia</li> </ul>                                                                                                                                                                                                                                                                                          | <ul style="list-style-type: none"> <li>•Biological: Haplo SCT with NK cells</li> <li>•Biological: Haplo SCT</li> </ul>                                                                                         | <ul style="list-style-type: none"> <li>•Fondazione Policlinico Universitario A. Gemelli IRCCS, Roma, RM, Italy</li> </ul>                                                                                                                                                                                                                                                                                                                                                                                                                                                                                                                                                                                                                                                                                                                   |



|    | Title                                                                                                                                                      | Status                  | Study Results        | Conditions                                                                                                                                                                                                                                                                                                                                                                                                                                                                         | Interventions                                                                                                                         | Locations                                                                                                                                |
|----|------------------------------------------------------------------------------------------------------------------------------------------------------------|-------------------------|----------------------|------------------------------------------------------------------------------------------------------------------------------------------------------------------------------------------------------------------------------------------------------------------------------------------------------------------------------------------------------------------------------------------------------------------------------------------------------------------------------------|---------------------------------------------------------------------------------------------------------------------------------------|------------------------------------------------------------------------------------------------------------------------------------------|
| 55 | <a href="#">Safety and Efficacy of Allogeneic NK Cells Therapy in Patients With Advanced Hepatocellular Carcinoma</a>                                      | Recruiting              | No Results Available | •Hepatocellular Carcinoma                                                                                                                                                                                                                                                                                                                                                                                                                                                          | •Biological: allogeneic NK cells therapy                                                                                              | •The Fifth Medical Center of PLA General Hospital, Beijing, Beijing, China                                                               |
| 56 | <a href="#">A Phase 1 Trial of CIML NK Cell Infusion for Myeloid Disease Relapse After Hematopoietic Cell Transplantation</a>                              | Recruiting              | No Results Available | •Acute Myeloid Leukemia<br>•Myelodysplastic Syndromes<br>•Myeloproliferative Neoplasm<br>•Juvenile Myelomonocytic Leukemia                                                                                                                                                                                                                                                                                                                                                         | •Biological: CIML NK<br>•Drug: Fludarabine<br>•Drug: Cyclophosphamide                                                                 | •Boston Children's Hospital, Boston, Massachusetts, United States<br>•Dana Farber Cancer Institute, Boston, Massachusetts, United States |
| 57 | <a href="#">Intraperitoneal Infusion of ex Vivo-cultured Allogeneic NK Cells in Recurrent Ovarian Carcinoma Patients</a>                                   | Recruiting              | No Results Available | •Recurrent Ovarian Carcinoma<br>•Recurrent Fallopian Tube Carcinoma<br>•Recurrent Primary Peritoneal Carcinoma                                                                                                                                                                                                                                                                                                                                                                     | •Biological: UCB-NK cells<br>•Drug: Chemotherapy                                                                                      | •Radboudumc, Nijmegen, Netherlands                                                                                                       |
| 58 | <a href="#">Donor Natural Killer Cells, Cyclophosphamide, and Etoposide in Treating Children and Young Adults With Relapsed or Refractory Solid Tumors</a> | Recruiting              | No Results Available | •Recurrent Cutaneous Melanoma<br>•Recurrent Lip and Oral Cavity Carcinoma<br>•Recurrent Malignant Endocrine Neoplasm<br>•Recurrent Malignant Female Reproductive System Neoplasm<br>•Recurrent Malignant Male Reproductive System Neoplasm<br>•Recurrent Malignant Mesothelioma<br>•Recurrent Malignant Neoplasm of Multiple Primary Sites<br>•Recurrent Malignant Oral Neoplasm<br>•Recurrent Malignant Pharyngeal Neoplasm<br>•Recurrent Malignant Skin Neoplasm<br>•and 18 more | •Biological: Cord Blood-derived Expanded Allogeneic Natural Killer Cells<br>•Drug: Cyclophosphamide<br>•Drug: Etoposide               | •M D Anderson Cancer Center, Houston, Texas, United States                                                                               |
| 59 | <a href="#">Safety and Feasibility of the Use of Natural Killer Cells in Patients With Chronic Myeloid Leukemia</a>                                        | Enrolling by invitation | No Results Available | •Chronic Myeloid Leukemia                                                                                                                                                                                                                                                                                                                                                                                                                                                          | •Biological: Chronic Myeloid Leukemia + NK cell                                                                                       | •Centro Terapia e Tecnologia Celular, Porto Alegre, Rio Grande Do Sul, Brazil                                                            |
| 60 | <a href="#">Expanded Natural Killer Cells Following Haploidentical HSCT for AML/MDS</a>                                                                    | Recruiting              | No Results Available | •Acute Myeloid Leukemia<br>•Myelodysplastic Syndromes                                                                                                                                                                                                                                                                                                                                                                                                                              | •Other: NK-DLI                                                                                                                        | •University Hospital Basel, Basel, Switzerland                                                                                           |
| 61 | <a href="#">Cytokine Induced Memory-like NK Cell Adoptive Therapy for Relapsed AML After Allogeneic Hematopoietic Cell Transplant</a>                      | Recruiting              | No Results Available | •Acute Myeloid Leukemia in Children                                                                                                                                                                                                                                                                                                                                                                                                                                                | •Drug: CIML NK Cell Infusion<br>•Procedure: CD3+ T Cell Product Infusion                                                              | •Washington University School of Medicine, Saint Louis, Missouri, United States                                                          |
| 62 | <a href="#">Umbilical &amp; Cord Blood (CB) Derived CAR-Engineered NK Cells for B Lymphoid Malignancies</a>                                                | Active, not recruiting  | No Results Available | •B-Lymphoid Malignancies<br>•Acute Lymphocytic Leukemia<br>•Chronic Lymphocytic Leukemia<br>•Non-hodgkin Lymphoma                                                                                                                                                                                                                                                                                                                                                                  | •Drug: Fludarabine<br>•Drug: Cyclophosphamide<br>•Drug: Mesna<br>•Biological: iC9/CAR.19/IL15-Transduced CB-NK Cells<br>•Drug: AP1903 | •University of Texas MD Anderson Cancer Center, Houston, Texas, United States                                                            |

|    | Title                                                                                                                               | Status                 | Study Results        | Conditions                                                                                                                                                                                                                                                                                                                                                                                                                                                                                                                                                                                                                                   | Interventions                                                                                                                                                                                                                                                                                                                                                                                                                                                                         | Locations                                                                                                                                                        |
|----|-------------------------------------------------------------------------------------------------------------------------------------|------------------------|----------------------|----------------------------------------------------------------------------------------------------------------------------------------------------------------------------------------------------------------------------------------------------------------------------------------------------------------------------------------------------------------------------------------------------------------------------------------------------------------------------------------------------------------------------------------------------------------------------------------------------------------------------------------------|---------------------------------------------------------------------------------------------------------------------------------------------------------------------------------------------------------------------------------------------------------------------------------------------------------------------------------------------------------------------------------------------------------------------------------------------------------------------------------------|------------------------------------------------------------------------------------------------------------------------------------------------------------------|
| 63 | <a href="#">Phase I Trial of Universal Donor NK Cell Therapy in Combination With ALT803</a>                                         | Active, not recruiting | No Results Available | <ul style="list-style-type: none"><li>•Acute Myeloid Leukemia</li><li>•Myelodysplastic Syndrome</li><li>•Acute Lymphoblastic Leukemia</li><li>•Chronic Myeloid Leukemia</li><li>•Chronic Lymphocytic Leukemia</li><li>•Non Hodgkin Lymphoma</li><li>•Hodgkin Lymphoma</li><li>•Myeloproliferative Syndromes</li><li>•Plasma Cell Myeloma</li><li>•Colon Carcinoma</li><li>•and 4 more</li></ul>                                                                                                                                                                                                                                              | <ul style="list-style-type: none"><li>•Biological: Natural Killer (NK) Cells</li><li>•Biological: ALT803</li></ul>                                                                                                                                                                                                                                                                                                                                                                    | <ul style="list-style-type: none"><li>•University Hospitals Cleveland Medical Center, Case Comprehensive Cancer Center, Cleveland, Ohio, United States</li></ul> |
| 64 | <a href="#">Cytokine Induced Memory-like NK Cell Adoptive Therapy After Haploidentical Donor Hematopoietic Cell Transplantation</a> | Recruiting             | No Results Available | <ul style="list-style-type: none"><li>•Acute Myeloid Leukemia</li></ul>                                                                                                                                                                                                                                                                                                                                                                                                                                                                                                                                                                      | <ul style="list-style-type: none"><li>•Procedure: Graft cell infusion</li><li>•Drug: Tacrolimus</li><li>•Drug: Mycophenolate mofetil</li><li>•Drug: G-CSF</li><li>•Procedure: CIML NK cell infusion</li><li>•Drug: ALT-803</li><li>•Procedure: Leukapheresis</li></ul>                                                                                                                                                                                                                | <ul style="list-style-type: none"><li>•Washington University School of Medicine, Saint Louis, Missouri, United States</li></ul>                                  |
| 65 | <a href="#">Personalized NK Cell Therapy in CBT</a>                                                                                 | Recruiting             | No Results Available | <ul style="list-style-type: none"><li>•Accelerated Phase Chronic Myelogenous Leukemia, BCR-ABL1 Positive</li><li>•Acute Biphenotypic Leukemia</li><li>•Acute Lymphoblastic Leukemia</li><li>•Acute Lymphoblastic Leukemia in Remission</li><li>•Acute Myeloid Leukemia With Myelodysplasia-Related Changes</li><li>•Acute Myeloid Leukemia With Variant MLL Translocations</li><li>•B Acute Lymphoblastic Leukemia With t(9;22)(q34.1;q11.2); BCR-ABL1</li><li>•Chemotherapy-Related Leukemia</li><li>•Chronic Myelomonocytic Leukemia</li><li>•Chronic Phase Chronic Myelogenous Leukemia, BCR-ABL1 Positive</li><li>•and 16 more</li></ul> | <ul style="list-style-type: none"><li>•Biological: Allogeneic Natural Killer Cell Line NK-92</li><li>•Biological: Anti-Thymocyte Globulin</li><li>•Drug: Busulfan</li><li>•Drug: Clofarabine</li><li>•Drug: Cyclophosphamide</li><li>•Drug: Fludarabine Phosphate</li><li>•Other: Laboratory Biomarker Analysis</li><li>•Drug: Melphalan</li><li>•Biological: Rituximab</li><li>•Radiation: Total-Body Irradiation</li><li>•Procedure: Umbilical Cord Blood Transplantation</li></ul> | <ul style="list-style-type: none"><li>•M D Anderson Cancer Center, Houston, Texas, United States</li></ul>                                                       |
| 66 | <a href="#">Humanized Anti-GD2 Antibody Hu3F8 and Allogeneic Natural Killer Cells for High-Risk Neuroblastoma</a>                   | Active, not recruiting | No Results Available | <ul style="list-style-type: none"><li>•Neuroblastoma</li><li>•High-Risk</li></ul>                                                                                                                                                                                                                                                                                                                                                                                                                                                                                                                                                            | <ul style="list-style-type: none"><li>•Drug: cyclophosphamide</li><li>•Biological: NK cells</li><li>•Biological: hu3F8</li><li>•Drug: rIL-2</li></ul>                                                                                                                                                                                                                                                                                                                                 | <ul style="list-style-type: none"><li>•Memorial Sloan Kettering Cancer Center, New York, New York, United States</li></ul>                                       |

|    | Title                                                                                                                                                                            | Status                 | Study Results        | Conditions                                                                                                                     | Interventions                                                                                                                         | Locations                                                                                                                                                                                                                                                                                                                                                                                                                                                                                                                                                                                                                                                                                                                                                                                                                                                                                                                                                                                                        |
|----|----------------------------------------------------------------------------------------------------------------------------------------------------------------------------------|------------------------|----------------------|--------------------------------------------------------------------------------------------------------------------------------|---------------------------------------------------------------------------------------------------------------------------------------|------------------------------------------------------------------------------------------------------------------------------------------------------------------------------------------------------------------------------------------------------------------------------------------------------------------------------------------------------------------------------------------------------------------------------------------------------------------------------------------------------------------------------------------------------------------------------------------------------------------------------------------------------------------------------------------------------------------------------------------------------------------------------------------------------------------------------------------------------------------------------------------------------------------------------------------------------------------------------------------------------------------|
| 67 | <a href="#">Immunotherapy of Relapsed Refractory Neuroblastoma With Expanded NK Cells</a>                                                                                        | Active, not recruiting | No Results Available | •Neuroblastoma                                                                                                                 | •Drug: Dinutuximab<br>•Biological: NK Cells<br>•Drug: Lenalidomide                                                                    | •Children's Hospital Los Angeles, Los Angeles, California, United States<br><br>•UCSF Helen Diller Family Comprehensive Cancer Center, San Francisco, California, United States<br><br>•AFLAC Cancer Center and Blood Disorders Service of Children's Healthcare of Atlanta - Egleston Campus, Atlanta, Georgia, United States<br><br>•University of Chicago Comer Children's Hospital, Chicago, Illinois, United States<br><br>•Childrens Hospital Boston, Dana-Farber Cancer Institute., Boston, Massachusetts, United States<br><br>•C.S Mott Children's Hospital, Ann Arbor, Michigan, United States<br><br>•Cincinnati Children's Hospital Medical Center, Cincinnati, Ohio, United States<br><br>•Nationwide Children's Hospital, Columbus, Ohio, United States<br><br>•Children's Hospital of Philadelphia, Philadelphia, Pennsylvania, United States<br><br>•Cook Children's Healthcare System, Fort Worth, Texas, United States<br><br>•Seattle Children's Hospital, Seattle, Washington, United States |
| 68 | <a href="#">Cord Blood Natural Killer (NK) Cells in Leukemia/Lymphoma</a>                                                                                                        | Active, not recruiting | No Results Available | •Leukemia                                                                                                                      | •Drug: Lenalidomide<br>•Drug: Rituximab<br>•Drug: Fludarabine<br>•Drug: Cyclophosphamide<br>•Procedure: NK Cells<br>•Drug: Cytarabine | •University of Texas MD Anderson Cancer Center, Houston, Texas, United States                                                                                                                                                                                                                                                                                                                                                                                                                                                                                                                                                                                                                                                                                                                                                                                                                                                                                                                                    |
| 69 | <a href="#">Phase I Study of Adoptive Immunotherapy With Enriched and Expanded Autologous Natural Killer (NK) Cells for Patients With Ph+ Acute Lymphoblastic Leukemia (ALL)</a> | Active, not recruiting | No Results Available | •Acute Lymphoblastic Leukemia<br>•Complete Hematologic Remission (CHR)<br>•Persistent/Recurrent Minimal Residual Disease (MRD) | •Other: Autologous NK cells infusions                                                                                                 | •ISS/AIFA, Roma, Italy<br>•Ospedale S. Eugenio, Roma, Italy<br>•Università Cattolica del Sacro Cuore - Policlinico A. Gemelli, Roma, Italy<br>•Università degli Studi "Sapienza" - Dip Biotechnologie Cellulari ed Ematologia - Divisione di Ematologia, Roma, Italy<br>•Università degli Studi - Policlinico di Tor Vergata, Roma, Italy<br>•Università Degli Studi Di Roma "Sapienza" - Dipartimento Di Medicina Traslazionale E Di Precisione - U.O.C. Ematologia, Roma, Italy                                                                                                                                                                                                                                                                                                                                                                                                                                                                                                                                |
| 70 | <a href="#">Phase 2 STIR Trial: Haploidentical Transplant and Donor Natural Killer Cells for Solid Tumors</a>                                                                    | Active, not recruiting | No Results Available | •Ewing Sarcoma<br>•Neuroblastoma<br>•Rhabdomyosarcoma<br>•Osteosarcoma<br>•CNS Tumors                                          | •Procedure: Allogeneic HCT<br>•Drug: Donor NK Cell Infusion                                                                           | •Children's Hospital of Wisconsin, Milwaukee, Wisconsin, United States<br><br>•Froedtert and The Medical College of Wisconsin, Milwaukee, Wisconsin, United States                                                                                                                                                                                                                                                                                                                                                                                                                                                                                                                                                                                                                                                                                                                                                                                                                                               |



|    | Title                                                                                                                                 | Status                 | Study Results        | Conditions                | Interventions                                                                                                                                                                                                                                                                                                                                                 | Locations                                                                       |
|----|---------------------------------------------------------------------------------------------------------------------------------------|------------------------|----------------------|---------------------------|---------------------------------------------------------------------------------------------------------------------------------------------------------------------------------------------------------------------------------------------------------------------------------------------------------------------------------------------------------------|---------------------------------------------------------------------------------|
| 71 | <a href="#">Cytokine-induced Memory-like NK Cells in Patients With Acute Myeloid Leukemia (AML) or Myelodysplastic Syndrome (MDS)</a> | Active, not recruiting | No Results Available | •Leukemia, Myeloid, Acute | <ul style="list-style-type: none"><li>•Drug: Fludarabine</li><li>•Drug: Cyclophosphamide</li><li>•Procedure: Leukapheresis</li><li>•Biological: Cytokine-induced killer cells</li><li>•Biological: IL-2</li><li>•Drug: ALT-803</li><li>•Procedure: Peripheral blood for correlative studies</li><li>•Procedure: Bone marrow for correlative studies</li></ul> | •Washington University School of Medicine, Saint Louis, Missouri, United States |
